# Supplementary material
Source: ML conference proceedings conference paper supplement (https://openaccess.thecvf.com/content/CVPR_2019/html/Azar_Convolutional_Relational_Machine_CVPR_2019_paper.html)
Supplement: Supplementary file 1 [file Azar_Convolutional_Relational_Machine_CVPR_2019_supplemental.pdf]

## 1. Architecture

The architectures of  $\phi$ ,  $\psi$ , and  $\zeta$  are provided in Figure 1.

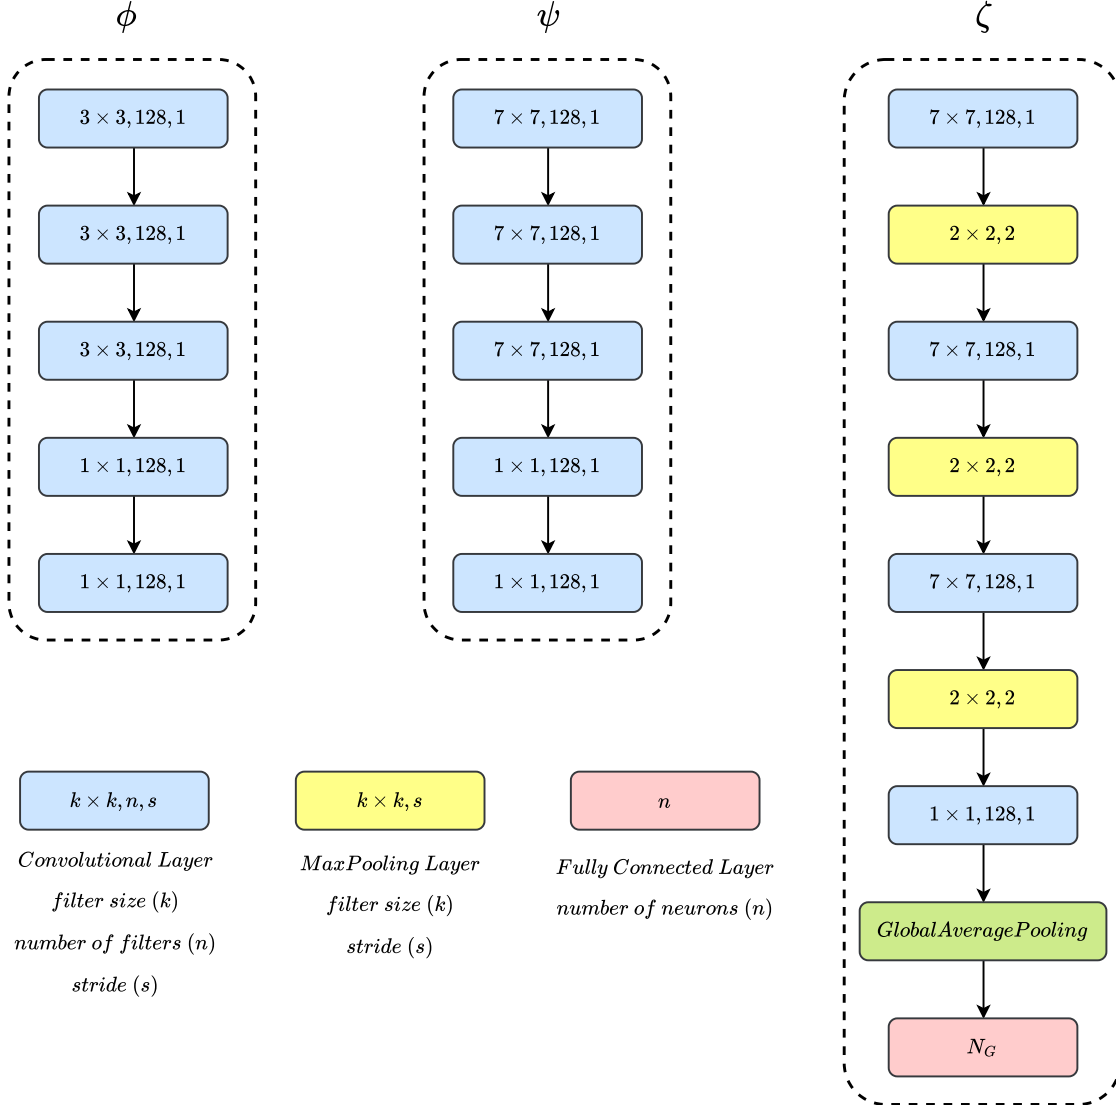

Figure 1. Details of the layers of  $\phi$ ,  $\psi$ , and  $\zeta$ .

## 2. Inference Time

Inference times for the components of our model are given in Table 1. Depth of the input feature map for the refinement and aggregation components have direct impact on their inference times. In the InceptionV3 case the feature map of layer *Mixed\_7c* has a depth of 2048. This depth is 832 for the layer *Mixed\_4f* in I3D. This is why the refinement and aggregation components are slower when using Inception-V3. When using I3D on multiple frames, the inference time of the backbone is much higher and the inference time of the other parts of the model become negligible. Therefore, we get high improvements

| Dataset    | Backbone-CNN | Backbone | Refinement | Aggregation |
|------------|--------------|----------|------------|-------------|
| Volleyball | Inception-V3 | 38       | 33         | 11          |
|            | I3D RGB/Flow | 182/151  | 13/13      | 5/4         |
| Collective | I3D RGB/Flow | 19/57    | 6/7        | 3/3         |

Table 1. Inference time (milliseconds) for various components of our model in different settings on a GTX 1080 Ti. The shapes of inputs for Volleyball, Collective (RGB), and Collective (Flow), are  $720 \times 1280$ ,  $240 \times 360$ , and  $480 \times 720$ , respectively. Feature maps in Volleyball and Collective are resized to  $43 \times 78$ , and  $30 \times 45$ , respectively.

at a relatively low cost.
